# Supplementary material for: Impact of High-to-Moderate Penetrance Genes on Genetic Testing: Looking over Breast Cancer
Source: MDPI journal article supplement (doi:10.3390/genes14081530), 2023-07-26
Supplement: s1 [file s1]

**Table S1:** Histology and ER, PR, and HER molecular profile correlated with each variant.

|                         | C DNA CHANGE          | HISTOLOGY                 | ER profile        | PR profile        | HER2 profile      |
|-------------------------|-----------------------|---------------------------|-------------------|-------------------|-------------------|
| ATM (NM_000051.3)       | c.6300C>G             | INVASIVE MUCINOUS         | POSITIVE          | POSITIVE          | NEGATIVE          |
|                         | c.6300C>G             | INVASIVE LOBULAR          | POSITIVE          | POSITIVE          | NEGATIVE          |
|                         | EXON 29 DELETION      | IDC-NST                   | POSITIVE          | POSITIVE          | NEGATIVE          |
|                         | c.2638+1G>A           | IDC-NST                   | POSITIVE          | POSITIVE          | NEGATIVE          |
| CHEK2<br>(NM_007194.3)  | c.1427C>T             | IDC-NST                   | UNKNOWN           | UNKNOWN           | UNKNOWN           |
|                         | c.793-1G>A            | IDC-NST                   | POSITIVE          | NEGATIVE          | NEGATIVE          |
|                         | c.507del              | IDC-NST                   | POSITIVE          | POSITIVE          | UNKNOWN           |
|                         | c.470T>C              | IDC-NST                   | NEGATIVE          | NEGATIVE          | UNKNOWN           |
|                         | EXON 9 DELETION       | IDC-NST                   | NEGATIVE          | NEGATIVE          | POSITIVE          |
| PALB2<br>(NM_024675.3)  | c.355C>T              | IDC-NST                   | NEGATIVE          | NEGATIVE          | NEGATIVE          |
|                         | c.355C>T              | IDC-NST                   | UNKNOWN           | UNKNOWN           | UNKNOWN           |
| RAD51D<br>(NM_002878.3) | c.803G>A              | IDC-NST                   | NEGATIVE          | NEGATIVE          | NEGATIVE          |
|                         | c.803G>A              | IDC-NST                   | POSITIVE/NEGATIVE | POSITIVE/NEGATIVE | NEGATIVE/POSITIVE |
|                         | c.757C>T              | DUCTAL<br>INTRAEPITHELIAL | POSITIVE          | NEGATIVE          | POSITIVE          |
| RAD51C<br>(NM_058216.2) | c.1026+5_1026+7delGTA | INVASIVE LOBULAR          | POSITIVE          | POSITIVE          | NEGATIVE          |
